# Supplementary material for: Hydrothermal Pretreatment of Date Palm (Phoenix dactyliferaL.) Leaflets and Rachis to Enhance Enzymatic Digestibility and Bioethanol Potential
Source: Hindawi journal article supplement (doi:10.1155/2015/216454), 2015-01-01

Leaflets

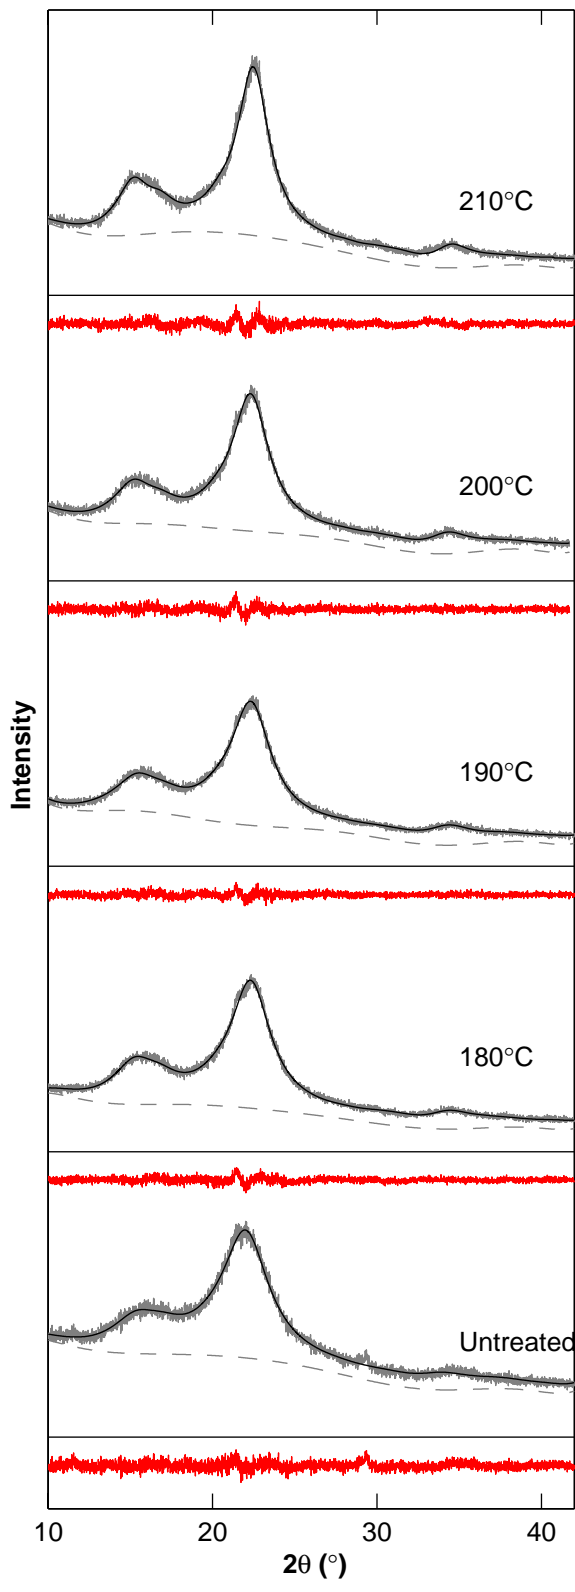

Rachis

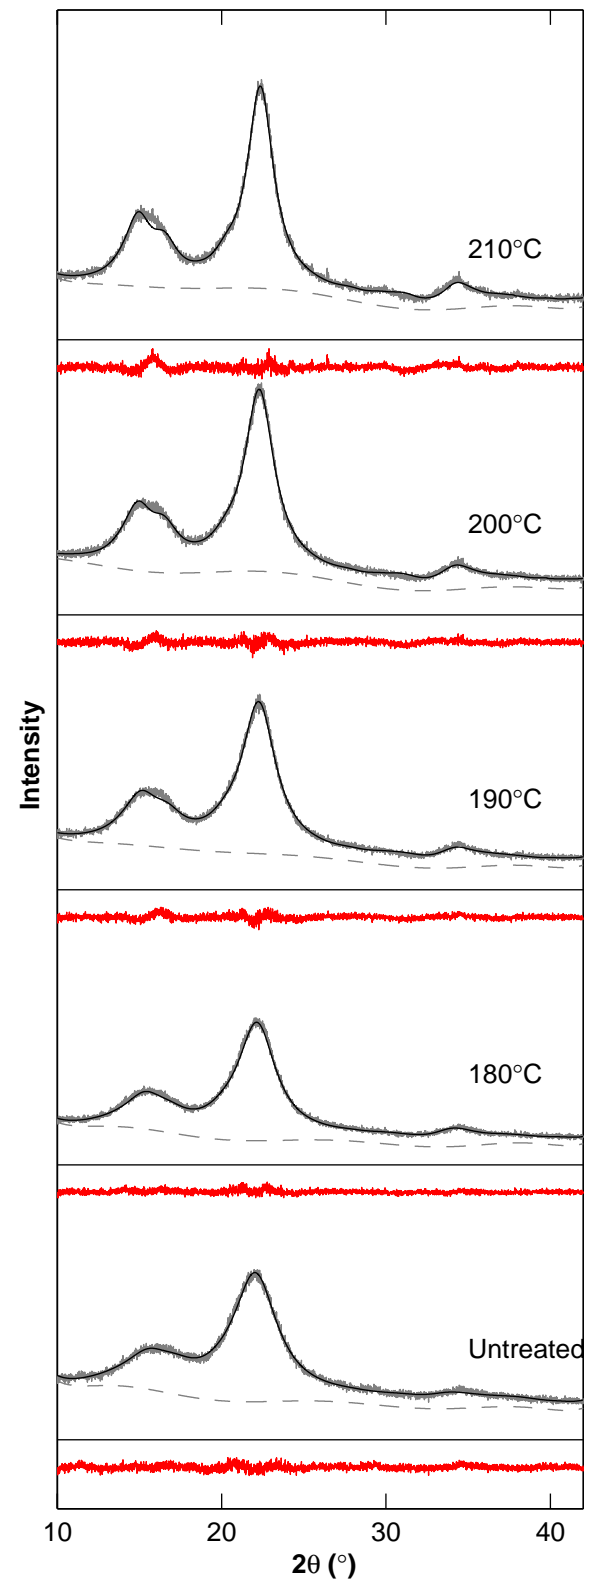

Supplement: f1 [file 216454.f1.pdf]
